# Supplementary material for: A nanopoint Schottky-gate array device: surface defect application and molecular detection
Source: Royal Society of Chemistry journal article supplement (doi:10.1039/c4ra15763j), 2015-01-01
Supplement: c4ra15763j1.pdf [file c4ra15763j1.pdf]

# Supplementary Information

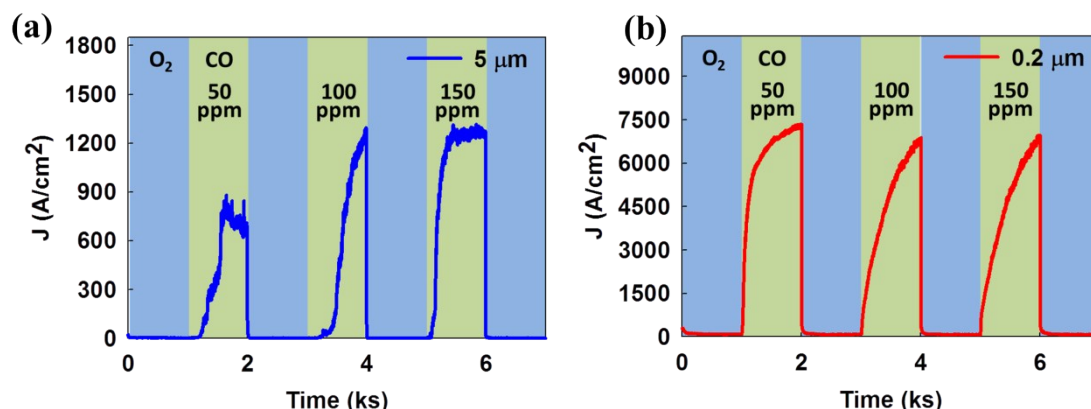

Figure S1: (a) Different CO levels can be monitored by using larger Schottky-gate area device. (b) For using nano point Schottky-gate area device, different CO levels can't be monitored.

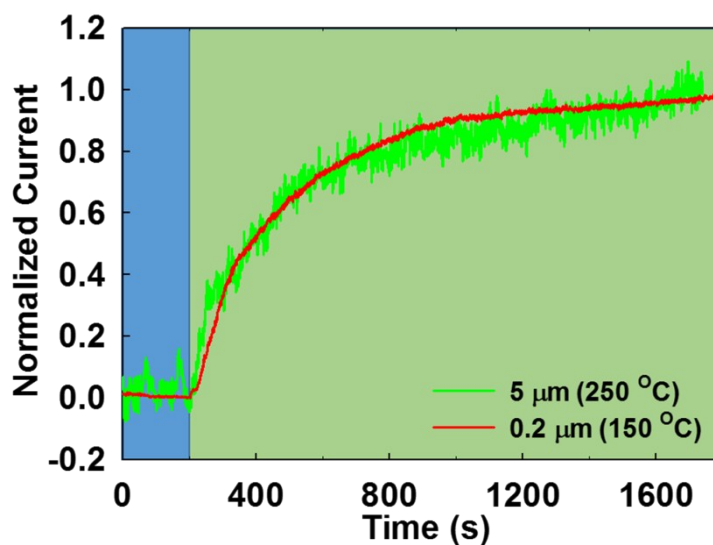

Figure S2: Using nano point Schottky-gate device, the same response can be got under low operating temperature. The Joule heating effect can increase local temperature almost 100°C.
